## Interaction of Post-Traumatic Stress Disorder and Race on Readmissions after Stroke

Chen Lin<sup>1,5</sup>, Peter H. King<sup>1,5</sup>, Joshua Richman<sup>3,5</sup>, Lori L. Davis<sup>2,4</sup>

Departments of <sup>1</sup>Neurology, <sup>2</sup>Psychiatry, and <sup>3</sup>Surgery The University of Alabama at Birmingham, Birmingham, AL 35294

<sup>4</sup>Tuscaloosa VA Medical Center, Tuscaloosa, AL

<sup>5</sup>Birmingham VA Medical Center, Birmingham, AL

†Correspondence should be sent to:

Chen Lin, M.D.

Departments of Neurology

The University of Alabama at Birmingham

Birmingham, AL 35294

Email. [clin@uabmc.edu](mailto:clin@uabmc.edu)

Phone: 205.975.8569

**Short title:** Race and PTSD impact on stroke readmissions

**Word count:** 4733 words

Total number: 3 tables, 1 figure

**Key Words:** Stroke, PTSD, racial disparities, readmissions, post-stroke complications

**Subject Terms:** Stroke, PTSD, racial disparities, readmissions, post-stroke complications

**Disclosure of Conflicts of Interest:** The authors have no conflicts of interest.

## **Abstract**

### **Background**

There is limited research on outcomes of patients with post-traumatic stress disorder (PTSD) who also develop stroke, particularly regarding racial disparities. Our goal was to determine whether PTSD is associated with the risk of hospital readmission after stroke and if racial disparities existed.

### **Methods**

The analytical sample consisted of all veterans receiving care in the Veterans Health Administration (VHA) who were identified as having a new stroke requiring inpatient treatment based on International Classification of Diseases codes. The retrospective cohort data was obtained from the VA Corporate Data Warehouse. The main outcome was any readmission to VHA. The hypothesis that PTSD is associated with readmission after stroke was tested using Cox regression adjusted for patient characteristics with PTSD as a time-varying covariate.

### **Results**

Our final cohort consisted of 93,652 patients with inpatient stroke diagnosis and no prior VHA codes for stroke starting from 1999 with follow-up through 6-August-2022. Of these patients, 12,916 (13.8%) had comorbid PTSD. Of the final cohort, 16,896 patients (18.0%) with stroke were readmitted. Our fully-adjusted model for readmission found an interaction between African Americans (AA) and PTSD with a hazard ratio of 1.09 (95% CI 1.00-1.20;  $p < 0.05$ ). In stratified models, PTSD has a significant HR of 1.10 (1.02-1.18,  $p = 0.01$ ) for AA but not White veterans 1.05 (0.99-1.11,  $p = 0.10$ ).

### **Conclusion**

Among AA Veterans who suffered stroke, pre-existing PTSD was associated with increased risk of readmission, which was not significant among White veterans. This study highlights the need to focus on high-risk groups to reduce readmissions after stroke.

## Introduction

Posttraumatic stress disorder (PTSD) has a lifetime prevalence of 6.1% in the U.S. adult population, ranging from 3.4% to 26.9% in civilian populations and 7.7% to 17.0% in military populations.<sup>1,2,3,4</sup> The economic burden on society is staggering – estimated at \$232 billion annually in the U.S. for 2018.<sup>5</sup> PTSD is an enduring disease that affects military veterans years after their service and for the remainder of their lives. Veterans of World War II and the Korean War had 12% prevalence rates 45 years after combat,<sup>6</sup> 15% prevalence rates for Vietnam War veterans 15 years after combat,<sup>4</sup> and 17% prevalence rates for military personnel returning from Iraq and Afghanistan.<sup>7</sup> For this most recent group of veterans that served in Iraq and Afghanistan, PTSD is the most commonly diagnosed psychiatric disorder.<sup>7</sup>

PTSD has been identified as a major risk factor for developing various medical illnesses, including stroke.<sup>8</sup> A meta-analysis found that the pooled hazard ratio showed that having PTSD was associated with a 59% higher risk of developing an incident stroke.<sup>8</sup> The risk of developing cardiovascular disease and stroke is common to both civilian<sup>9</sup> and veteran populations with PTSD.<sup>10-12</sup> In a cohort of prisoners of war, those with severe and chronic stress had a higher risk of having a stroke.<sup>13</sup> Additionally, young veterans less than 40 years old with PTSD have a 36% for increased risk of stroke compared with those veterans without PTSD.<sup>14</sup>

Unfortunately, there is limited research on outcomes of patients with PTSD who also develop stroke, particularly regarding racial disparities. In veterans with PTSD, worse treatment outcomes were seen for Black compared to White veterans.<sup>15</sup> In patients with stroke, multiple areas of care are impacted by racial disparities, including those affecting outcomes such as recovery and readmission rates.<sup>16,17</sup> Readmission rates are an important outcome and priority area of interest for medical systems.<sup>18</sup> Our main goal for this study was to determine whether patients diagnosed with PTSD who had a stroke have different risks for hospital readmission compared to patients who had a stroke without a PTSD diagnosis. Our secondary goal was to examine if race affected these rates. We hypothesized that patients with PTSD that had a stroke would be at higher risk of readmissions compared to those without PTSD.

## Methods

**Participants:** The Research and Development Committee and the Institutional Review Board at the Birmingham Veterans Affairs Health Care System approved the study. The analytical sample consisted of all veterans receiving care in the Veterans Health Administration (VHA) who were identified as having an incident inpatient stroke without prior evidence of diagnostic codes for stroke in the VHA. Veterans could be included if they had an initial code for stroke from an outpatient encounter on the same day as their index inpatient hospitalization. Stroke diagnosis was identified by International Classification of Diseases (ICD) -9 codes 433.x1, 434.00, 434.x1, or 436.x or any ICD-10 code in the I63 group. The retrospective cohort data obtained for this study came from the VA Corporate Data Warehouse through the Veterans Administration Informatics and Computing Infrastructure (VINCI), which links all data from the VA electronic health record, death registry and outpatient pharmacy.

**Outcome:** The main outcome was readmission to the VA with a diagnostic code for stroke coded as a time-to-event with date of last VHA encounter (inpatient or outpatient).

**Variables:** Available covariates based on ICD codes included diabetes, hypertension, pulmonary hypertension, hyperlipidemia, myocardial infarction, congestive heart failure, valvular disease, peripheral vascular disease, drug abuse, alcohol abuse, and PTSD. Race and sex were obtained from VHA records based on self-report and age at incident stroke was normalized to have a mean of 0 and standard deviation of 1 so that model estimates are interpretable as the hazard ratio for a 1 standard deviation increase in age.

Statistical Analysis: Descriptive statistics were calculated and differences between groups were tested using t-tests for continuous variables and chi-square tests for proportions. The study hypothesis that PTSD is associated with readmission after stroke with readmission related to stroke was explored using Kaplan-Meier curves and modeled using Cox regression adjusted for patient characteristics. While most comorbidities were present at the time of the index stroke, PTSD and other comorbidities were treated as time-dependent covariates to account for cases where new diagnoses emerged between the index stroke and stroke-related readmission. Pre-specified covariates of interest for the models were determined and we had a priori interest in racial disparities leading to the testing of the race interaction. Identification of PTSD, comorbidities, and other health conditions required at least two instances of appropriate ICD-9 or ICD-10 codes at least 30 days apart to avoid spurious diagnoses but were recorded as of the first date, a method used for other VHA datasets.<sup>19</sup> Examination of stratified Kaplan-Meier curves suggested a possibly meaningful interaction between race and PTSD. After formally testing for an interaction in minimally adjusted and fully adjusted Cox models, we presented adjusted model results stratified by race.

## Results

Our final cohort consisted of 93,652 patients with inpatient stroke diagnosis and no prior VHA codes for stroke from 1999 identified up to 20-April-2022 with follow-up for readmission through 6-August-2022. Of these patients, 12,916 (13.8%) also had comorbid PTSD at the time of their stroke. Of the final cohort, 16,896 patients (18.0%) with an index diagnosis of stroke were readmitted for any cause to a VA hospital facility. Table 1 describes readmissions information, length of follow-up, and medical comorbidities of our population, stratified by race. In our population, 97.1% were males, 62.89% were White, and 22.4% were African-American. Common comorbidities included: Type 2 Diabetes Mellitus (67.3%), hyperlipidemia (72.8%), and hypertension (92.9%). Table 2 describes readmissions information and medical comorbidities stratified by race and pre-existing diagnosis of PTSD prior to stroke. We noted evidence of an interaction between race and PTSD as risks for stroke-related readmission, with a p-value of 0.02 in a model adjusted only for race and PTSD (with interaction) and p=0.06 in a fully-adjusted model.

The probability of not having a readmission after stroke over time is shown in Figure 1, plotted separately by race (White and African American) with PTSD treated as a time-dependent covariate. At cohort entry, 13.4% of White veterans had PTSD, compared to 18.4% of African American veterans. Both White and African American veterans with PTSD had higher rates of type 2 diabetes mellitus, substance abuse including illegal drugs and alcohol, hyperlipidemia, and smoking compared to their respective groups without PTSD. Both White and African American veterans without PTSD had higher rates of congestive heart failure compared to their respective groups with PTSD. Both groups had similar rates of hypertension. On average for African American veterans, 0.02% were readmitted per year of follow-up for those without PTSD and 0.03% for those with PTSD. On average for White veterans, 0.02% were readmitted per year of follow-up in both those with and without PTSD.

Our fully adjusted model for readmission, both overall and stratified by race, is presented in Table 3. Our fully-adjusted model found African Americans with PTSD who had a stroke had a hazard ratio of 1.09 (95% CI 1.00-1.20; p<0.05) for readmissions in the overall veteran population. In the overall population, other significant variables that increased the risk for readmission included: age (HR 1.01, 95% CI 1.00-1.01; p<0.01), congestive heart failure (HR 1.11, 95% CI 1.05-1.18; p<0.01), type 2 diabetes (HR 1.06, 95% CI 1.01-1.11; p=0.01), history of myocardial infarction (HR 1.17, 95% CI 1.10-1.25; p<0.01), and peripheral vascular disease (HR 1.16, 95% CI 1.11-1.23; p<0.01). Variables that decreased risk included: hypertension (HR 0.87, 95% CI 0.83-0.91; p<0.01) and hyperlipidemia (HR 0.93, 95% CI 0.89-0.98; p<0.01).

Within the African American veteran population that had stroke, those with PTSD had a hazard ratio of 1.10 (95% CI 1.02-1.19;  $p=0.01$ ) for readmissions shown in Table 2. Other significant variables that increased the risk for readmissions included: age (HR 1.01, 95% CI 1.00-1.01;  $p<0.01$ ), type 2 diabetes (HR 1.13, 95% CI 1.04-1.23;  $p<0.01$ ), drug abuse (HR 1.22, 95% CI 1.10-1.35;  $p<0.01$ ), history of myocardial infarction (HR 1.15, 95% CI 1.01-1.30;  $p=0.03$ ), and peripheral vascular disease (HR 1.12, 95% CI 1.02-1.24;  $p=0.02$ ). Within the White veteran population, those that had PTSD had a hazard ratio of 1.05 (95% CI 0.99-1.11;  $p=0.09$ ) for readmissions. Other significant variables that increased the risk for readmissions included: age (HR 1.01, 95% CI 1.00-1.01;  $p<0.01$ ), congestive heart failure (HR 1.11, 95% CI 1.04-1.19;  $p<0.01$ ), history of myocardial infarction (HR 1.18, 95% CI 1.10-1.28;  $p<0.01$ ), and peripheral vascular disease (HR 1.19, 95% CI 1.11-1.26;  $p<0.01$ ). Hypertension decreased the risk for readmissions in both African American (HR 0.81, 95% CI 0.74-0.89;  $p<0.01$ ) and White veterans (HR 0.89, 95% CI 0.84-0.95;  $p<0.01$ ). Hyperlipidemia was associated with a lower risk only in White veterans (HR 0.92, 95% CI 0.86-0.97;  $p<0.01$ ); whereas only in African Americans were type 2 diabetes (HR 1.13, 95% CI 1.04-1.23;  $p<0.01$ ) and drug abuse (HR 1.22, 95% CI 1.10-1.35;  $p<0.01$ ) associated with an increased risk for readmission.

## Discussion

In a large cohort of veterans who have been diagnosed with a stroke, we found that those with pre-existing PTSD had an increased risk of all-cause readmissions than those without PTSD. Additionally, we found that African Americans with PTSD who suffered stroke were more likely than their counterparts without PTSD to be re-hospitalized. This is one of the first studies showing that patients who have stroke and suffer from pre-existing PTSD have worse outcomes as suggested by a higher risk for re-hospitalization. This study underscores the importance of developing strategies to prevent re-hospitalization for this at-risk population.

PTSD has been associated with a significant increased risk of developing an ischemic stroke as an independent risk factor.<sup>12, 14</sup> Separately, patients without pre-existing PTSD have also been shown to be at risk of developing post-stroke PTSD.<sup>20-22</sup> Patients that develop post-stroke PTSD have also been shown to have worse outcome.<sup>20, 22, 23</sup> In survey studies of patients that develop post-stroke PTSD, patients have had worse quality of life and more issues with medication adherence.<sup>22, 23</sup> In our cohort, veterans with PTSD had higher rates of cardiac conditions and smoking, all of which likely contributed to readmission. A higher risk for readmission in African American veterans was associated with drug abuse and type 2 diabetes. A logical focus in the development of strategies to prevent re-admissions for these veterans would target these high-risk comorbidities. Our results help bridge the gap in knowledge of post-stroke outcomes in patients with PTSD showing that these patients are at higher-risk for being re-admitted. Prospective studies monitoring this high-risk population are needed to identify safety net measures that may reduce readmissions.

Reducing readmissions is a key priority for medical systems.<sup>18</sup> While this study did not examine reasons for readmission, we did follow patients for 20 years after their initial stroke admission. Studies on post-stroke readmissions have generally focused on identifying predictors based on medical comorbidities.<sup>24, 25</sup> Most studies examine how post-stroke mental health issues lead to worse outcomes, but few focus on readmissions.<sup>26-28</sup> Stein et al.<sup>19</sup> examined whether depression after ischemic stroke and myocardial infarction led to more readmissions in the Nationwide Readmissions Database. They found that not only was depression after stroke more likely to lead to readmission, but that the risk was greater than with depression after myocardial infarction.<sup>26</sup> In our veteran cohort, veterans with PTSD had increased

readmissions compared to those without PTSD. A racial disparity was also seen with African American having higher risk for readmission compared to White veterans.

Our finding that African Americans veterans who suffer stroke had higher risk of readmission if previously diagnosed with PTSD parallels findings in other populations. In the civilian population, African Americans tended to have higher rates of readmission.<sup>29</sup> For veterans, one recent study examining hospital readmissions following hospitalization for COVID-19 also found higher rates of readmission in African American veterans. Interestingly, in our study, White and African Americans with PTSD shared many similar medical comorbidities (hypertension, smoking, etc.) compared to their counterparts without PTSD, suggesting that other factors are at play for the higher risk of readmissions. There are likely issues not covered by our analysis including socioeconomic status, caregiver support, and community support that may contribute to the higher risk of all-cause readmissions in the African American veteran population. We did see in our fully adjusted model that type 2 diabetes and drug abuse were associated with a higher readmission risk, but not in White veterans. Our study is the first to find that African Americans veterans with stroke are at higher risk of all-cause readmissions than non-African Americans, particularly if they also suffer from PTSD.

Recent trends in declining readmissions nationwide have been tied to hospitals' responding to incentives to reduce readmissions.<sup>18</sup> The VHA has been collaborating with the Centers for Medicare and Medicaid Services to report hospital performance and reduce all-cause readmission rates.<sup>30</sup> Within the VHA, readmission rates for patients with heart failure have been declining.<sup>31</sup> However, among those veterans admitted with cardiac issues or pneumonia, those admitted at VHA hospitals were associated with higher 30-day risk-standardized all-cause readmission rates than those admitted to non-VHA hospitals, both nationally and within similar geographic areas.<sup>30</sup> In patients with stroke, a Centers for Medicare & Medicaid Services and VHA retrospective study compared a basic Medicare and Medicaid model to a more comprehensive model. The comprehensive model included focusing on social factors such as homelessness and clinical factors such as stroke severity. However, neither model predicted readmission rates.<sup>32</sup> While this study identified those with a mental health disorder, neither a PTSD-specific diagnosis nor symptoms were recorded.

Our results highlight an important area for potential improvement in future programs to assess and prevent readmissions for veterans with stroke both with and without PTSD in VHA hospitals. So far, the data available have not accounted for the impact of PTSD symptoms which are more frequent in the veteran population. An improved way to account for PTSD symptoms and link them with readmission data is necessary. Additionally, incentives have been shown to improve readmission rates.<sup>18</sup> Future interventions to reduce readmission rates in patients with stroke should also consider monitoring and treating PTSD symptoms. Our findings indicate that post-discharge transitional care after stroke and monitoring for PTSD symptoms after stroke could be particularly important in African American veterans.

#### Limitations

The present study has several strengths, including its large cohort but also has several limitations. First, because this is a retrospective national cohort study, it is subject to inherent biases, such as residual confounding. Second, we used ICD codes to identify patients rather than primary clinical data. Although we included patients with the diagnosis of stroke, data regarding type of stroke including ischemic or hemorrhagic were not distinguished. Third, women were under-represented in our study and limits the

generalizability. Fourth, because an administrative dataset was used, this data often has errors in diagnosis code allocation. Finally, because the VHA database only captures VHA readmissions, other hospital readmissions were not captured unless they were also transferred to a VHA hospital. This means we likely underestimated readmissions rates based on conservative estimates of readmission.

**Conclusion:**

Among AA Veterans who suffered stroke, PTSD was associated with increased readmission, but the association was not significant among White veterans. Certain risk factors, such as diabetes and drug abuse, were also associated with increased risk for readmission in AA but not White veterans. This study highlights the need for further investigation into this high-risk group including the development of post-discharge transitional care plans to reduce readmissions after stroke.

**Study Funding:** Dr. Lin is supported by VA IK2 CX002104 and VA I21 RX003612.

## References

1. Davidson JR, Stein DJ, Shalev AY, Yehuda R. Posttraumatic stress disorder: Acquisition, recognition, course, and treatment. *J Neuropsychiatry Clin Neurosci*. 2004;16:135-147
2. Schein J, Houle C, Urganus A, Cloutier M, Patterson-Lomba O, Wang Y, King S, Levinson W, Guérin A, Lefebvre P, et al. Prevalence of post-traumatic stress disorder in the united states: A systematic literature review. *Curr Med Res Opin*. 2021;37:2151-2161
3. Cohen BE, Marmar C, Ren L, Bertenthal D, Seal KH. Association of cardiovascular risk factors with mental health diagnoses in iraq and afghanistan war veterans using va health care. *JAMA*. 2009;302:489-492
4. Dohrenwend BP, Turner JB, Turse NA, Adams BG, Koenen KC, Marshall R. The psychological risks of vietnam for u.S. Veterans: A revisit with new data and methods. *Science (New York, N.Y.)*. 2006;313:979-982
5. Davis LL, Schein J, Cloutier M, Gagnon-Sanschagrin P, Maitland J, Urganus A, Guerin A, Lefebvre P, Houle CR. The economic burden of posttraumatic stress disorder in the united states from a societal perspective. *J Clin Psychiatry*. 2022;83
6. Spiro A, 3rd, Schnurr PP, Aldwin CM. Combat-related posttraumatic stress disorder symptoms in older men. *Psychol Aging*. 1994;9:17-26
7. Hoge CW, Castro CA, Messer SC, McGurk D, Cotting DI, Koffman RL. Combat duty in iraq and afghanistan, mental health problems, and barriers to care. *N Engl J Med*. 2004;351:13-22
8. Nanavati HD, Arevalo A, Memon AA, Lin C. Associations between posttraumatic stress and stroke: A systematic review and meta-analysis. *J Trauma Stress*. 2023;36:259-271
9. Chen MH, Pan TL, Li CT, Lin WC, Chen YS, Lee YC, Tsai SJ, Hsu JW, Huang KL, Tsai CF, et al. Risk of stroke among patients with post-traumatic stress disorder: Nationwide longitudinal study. *The British journal of psychiatry : the journal of mental science*. 2015;206:302-307
10. Kubzansky LD, Koenen KC, Spiro A, 3rd, Vokonas PS, Sparrow D. Prospective study of posttraumatic stress disorder symptoms and coronary heart disease in the normative aging study. *Arch Gen Psychiatry*. 2007;64:109-116
11. Cohen BE, Marmar CR, Neylan TC, Schiller NB, Ali S, Whooley MA. Posttraumatic stress disorder and health-related quality of life in patients with coronary heart disease: Findings from the heart and soul study. *Archives of General Psychiatry*. 2009;66:1214-1220
12. Perkins JD, Wilkins SS, Kamran S, Shuaib A. Post-traumatic stress disorder and its association with stroke and stroke risk factors: A literature review. *Neurobiol Stress*. 2021;14:100332
13. Brass LM, Page WF. Stroke in former prisoners of war. *J Stroke Cerebrovasc Dis*. 1996;6:72-78
14. Rosman L, Sico JJ, Lampert R, Gaffey AE, Ramsey CM, Dziura J, Chui PW, Cavanagh CE, Brandt C, Haskell S, et al. Posttraumatic stress disorder and risk for stroke in young and middle-aged adults: A 13-year cohort study. *Stroke*. 2019;50:2996-3003
15. Georgina M. Gross , Ph.D. , Noelle Smith , Ph.D. , Ryan Holliday , Ph.D. , David C. Rozek , Ph.D. , Rani Hoff , Ph.D. , Ilan Harpaz-Rotem , Ph.D. Racial disparities in clinical outcomes of veterans affairs residential ptsd treatment between black and white veterans. *Psychiatric Services*. 2022;73:126-132
16. Somani S, Nanavati H, Zhou X, Lin C. African americans and women have lower functional gains during acute inpatient rehabilitation after hemorrhagic stroke. *Am J Phys Med Rehabil*. 2022
17. Carthon JMB, Brom H, McHugh M, Daus M, French R, Sloane DM, Berg R, Merchant R, Aiken LH. Racial disparities in stroke readmissions reduced in hospitals with better nurse staffing. *Nurs Res*. 2022;71:33-42



18. Zuckerman RB, Sheingold SH, Orav EJ, Ruhter J, Epstein AM. Readmissions, observation, and the hospital readmissions reduction program. *N Engl J Med*. 2016;374:1543-1551
19. McDonald MN, Lakshman Kumar P, Srinivasasainagendra V, Nair A, Rocco AP, Wilson AC, Chiles JW, Richman JS, Pinson SA, Dennis RA, et al. Novel genetic loci associated with osteoarthritis in multi-ancestry analyses in the million veteran program and uk biobank. *Nat Genet*. 2022;54:1816-1826
20. Garton ALA, Sisti JA, Gupta VP, Christophe BR, Connolly ES. Poststroke post-traumatic stress disorder. *Stroke*. 2017;48:507-512
21. Schultebrucks K, Wen T, Kronish IM, Willey J, Chang BP. Post-traumatic stress disorder following acute stroke. *Current Emergency and Hospital Medicine Reports*. 2020;8:1-8
22. Stein LA, Goldmann E, Zamzam A, Luciano JM, Messé SR, Cucchiara BL, Kasner SE, Mullen MT. Association between anxiety, depression, and post-traumatic stress disorder and outcomes after ischemic stroke. *Front Neurol*. 2018;9:890
23. Kronish IM, Edmondson D, Goldfinger JZ, Fei K, Horowitz CR. Posttraumatic stress disorder and adherence to medications in survivors of strokes and transient ischemic attacks. *Stroke*. 2012;43:2192-2197
24. Lichtman JH, Leifheit-Limson EC, Jones SB, Watanabe E, Bernheim SM, Phipps MS, Bhat KR, Savage SV, Goldstein LB. Predictors of hospital readmission after stroke. *Stroke*. 2010;41:2525-2533
25. Sennfält S, Petersson J, Ullberg T, Norrving B. Patterns in hospital readmissions after ischaemic stroke - an observational study from the swedish stroke register (riksstroke). *Eur Stroke J*. 2020;5:286-296
26. Stein LK, Kornspun A, Erdman J, Dhamoon MS. Readmissions for depression and suicide attempt following stroke and myocardial infarction. *Cerebrovascular Diseases Extra*. 2020;10:94-104
27. Johansen HL, Wielgosz AT, Nguyen K, Fry RN. Incidence, comorbidity, case fatality and readmission of hospitalized stroke patients in canada. *Can J Cardiol*. 2006;22:65-71
28. Lin C, Babiker A, Srdanovic N, Kocherginsky M, Harvey RL. Depressive symptoms after stroke are associated with worse recovery. *Int J Psychiatry Med*. 2020;55:227-238
29. Gardener H, Leifheit EC, Lichtman JH, Wang K, Wang Y, Gutierrez CM, Ciliberti-Vargas MA, Dong C, Robichaux M, Romano JG, et al. Race-ethnic disparities in 30-day readmission after stroke among medicare beneficiaries in the florida stroke registry. *J Stroke Cerebrovasc Dis*. 2019;28:104399
30. Nuti SV, Qin L, Rumsfeld JS, Ross JS, Masoudi FA, Normand S-LT, Murugiah K, Bernheim SM, Suter LG, Krumholz HM. Association of admission to veterans affairs hospitals vs non-veterans affairs hospitals with mortality and readmission rates among older men hospitalized with acute myocardial infarction, heart failure, or pneumonia. *JAMA*. 2016;315:582-592
31. Parizo JT, Kohsaka S, Sandhu AT, Patel J, Heidenreich PA. Trends in readmission and mortality rates following heart failure hospitalization in the veterans affairs health care system from 2007 to 2017. *JAMA Cardiol*. 2020;5:1042-1047
32. Keyhani S, Myers LJ, Cheng E, Hebert P, Williams LS, Bravata DM. Effect of clinical and social risk factors on hospital profiling for stroke readmission: A cohort study. *Ann Intern Med*. 2014;161:775-784

Table 1: Characteristics of patients with readmission after stroke by race

| Variable                   | Class<br>(0=absent; 1=present) | Overall         |         | White veterans (N=58,895) |         | AA veterans<br>(N=20,952) |         | p-value<br>(White vs. AA) |
|----------------------------|--------------------------------|-----------------|---------|---------------------------|---------|---------------------------|---------|---------------------------|
|                            |                                | Total N or mean | % or sd | Total N or mean           | % or sd | Total N or mean           | % or sd |                           |
| Time to readmission (days) |                                | 682.7           | 1142.16 | 644.46                    | 1111.7  | 771.53                    | 1205.45 | <0.001                    |
| Readmissions/year          |                                | 0.02            | 0.18    | 0.02                      | 0.17    | 0.02                      | 0.2     | <0.001                    |
| Any Readmission            | No                             | 65038           | 81.45   | 48542                     | 82.42   | 16496                     | 78.73   | <0.001                    |
|                            | Yes                            | 14809           | 18.55   | 10353                     | 17.58   | 4456                      | 21.27   |                           |
| CHF                        | No                             | 29995           | 70.08   | 21562                     | 69.76   | 8433                      | 70.91   | 0.02                      |
|                            | Yes                            | 12804           | 29.92   | 9345                      | 30.24   | 3459                      | 29.09   |                           |
| Diabetes                   | No                             | 13428           | 31.37   | 10013                     | 32.4    | 3415                      | 28.72   | <0.001                    |
|                            | Yes                            | 29371           | 68.63   | 20894                     | 67.6    | 8477                      | 71.28   |                           |
| Drug abuse                 | No                             | 32725           | 76.46   | 24917                     | 80.62   | 7808                      | 65.66   | <0.001                    |
|                            | Yes                            | 10074           | 23.54   | 5990                      | 19.38   | 4084                      | 34.34   |                           |
| Alcohol abuse              | No                             | 22486           | 52.54   | 17205                     | 55.67   | 5281                      | 44.41   | <0.001                    |
|                            | Yes                            | 20313           | 47.46   | 13702                     | 44.33   | 6611                      | 55.59   |                           |
| Hyperlipidemia             | No                             | 10237           | 23.92   | 7047                      | 22.8    | 3190                      | 26.82   | <0.001                    |
|                            | Yes                            | 32562           | 76.08   | 23860                     | 77.2    | 8702                      | 73.18   |                           |
| Hypertension               | No                             | 2732            | 6.38    | 2243                      | 7.26    | 489                       | 4.11    | 0.252                     |
|                            | Yes                            | 40067           | 93.62   | 28664                     | 92.74   | 11403                     | 95.89   |                           |
| History of Smoking         | No                             | 32691           | 76.38   | 23911                     | 77.36   | 8780                      | 73.83   | <0.001                    |
|                            | Yes                            | 10108           | 23.62   | 6996                      | 22.64   | 3112                      | 26.17   |                           |
| Myocardial Infarction      | No                             | 34163           | 79.82   | 24358                     | 78.81   | 9805                      | 82.45   | 0.226                     |
|                            | Yes                            | 8636            | 20.18   | 6549                      | 21.19   | 2087                      | 17.55   |                           |
| Sex                        | Female                         | 2331            | 2.92    | 1605                      | 2.73    | 726                       | 3.47    | <0.001                    |
|                            | Male                           | 77516           | 97.08   | 57290                     | 97.27   | 20226                     | 96.53   |                           |
| Peripheral vascular        | No                             | 28159           | 65.79   | 19904                     | 64.4    | 8255                      | 69.42   | <0.001                    |
|                            | Yes                            | 14640           | 34.21   | 11003                     | 35.6    | 3637                      | 30.58   |                           |
| Follow-up time (days)      |                                | 1898.56         | 1765.39 | 1846.63                   | 1738.89 | 2044.54                   | 1829.98 | <0.001                    |

SD: standard deviation; CHF: congestive heart failure; AA: African American

| Variable                   | Class | White: No PTSD prior to CVA (N=51,022) |         | White: PTSD prior to CVA (N=7,873) |         | p-value | AA: No PTSD prior to CVA (N=17,089) |         | AA: PTSD prior to CVA (N=3,863) |         | p-value |
|----------------------------|-------|----------------------------------------|---------|------------------------------------|---------|---------|-------------------------------------|---------|---------------------------------|---------|---------|
|                            |       | Total N or mean                        | % or sd | Total N or mean                    | % or sd |         | Total N or mean                     | % or sd | Total N or mean                 | % or sd |         |
| Time to readmission (days) |       | 665.08                                 | 1131.79 | 511.05                             | 961.44  | <0.001  | 823.79                              | 1248.29 | 543.57                          | 965.38  | <0.001  |

Table 2: Characteristics of patients with readmission after stroke by race and pre-existing PTSD

|                    |        |       |      |      |      |        |       |      |      |      |        |
|--------------------|--------|-------|------|------|------|--------|-------|------|------|------|--------|
| Readmissions/year  |        | 0.02  | 0.17 | 0.02 | 0.16 | 0.907  | 0.02  | 0.2  | 0.03 | 0.2  | 0.634  |
| Any Readmission    | No     | 42055 | 82.4 | 6487 | 82.4 | 0.961  | 13464 | 78.8 | 3032 | 78.5 | 0.697  |
|                    | Yes    | 8967  | 17.6 | 1386 | 17.6 |        | 3625  | 21.2 | 831  | 21.5 |        |
| CHF                | No     | 18517 | 69.3 | 3045 | 73.1 | <0.001 | 6854  | 70.5 | 1579 | 72.9 | 0.026  |
|                    | Yes    | 8223  | 30.8 | 1122 | 26.9 |        | 2872  | 29.5 | 587  | 27.1 |        |
| Diabetes           | No     | 8821  | 33.0 | 1192 | 28.6 | <0.001 | 2876  | 29.6 | 539  | 24.9 | <0.001 |
|                    | Yes    | 17919 | 67.0 | 2975 | 71.4 |        | 6850  | 70.4 | 1627 | 75.1 |        |
| Drug abuse         | No     | 22315 | 83.5 | 2602 | 62.4 | <0.001 | 6851  | 70.4 | 957  | 44.2 | <0.001 |
|                    | Yes    | 4425  | 16.6 | 1565 | 37.6 |        | 2875  | 29.6 | 1209 | 55.8 |        |
| Alcohol abuse      | No     | 15564 | 58.2 | 1641 | 39.4 | <0.001 | 4696  | 48.3 | 585  | 27.0 | <0.001 |
|                    | Yes    | 11176 | 41.8 | 2526 | 60.6 |        | 5030  | 51.7 | 1581 | 73.0 |        |
| Hyperlipidemia     | No     | 6445  | 24.1 | 602  | 14.5 | <0.001 | 2754  | 28.3 | 436  | 20.1 | <0.001 |
|                    | Yes    | 20295 | 75.9 | 3565 | 85.6 |        | 6972  | 71.7 | 1730 | 79.9 |        |
| Hypertension       | No     | 1966  | 7.4  | 277  | 6.7  | 0.110  | 410   | 4.2  | 79   | 3.7  | 0.252  |
|                    | Yes    | 24774 | 92.7 | 3890 | 93.4 |        | 9316  | 95.8 | 2087 | 96.4 |        |
| History of Smoking | No     | 21117 | 79.0 | 3241 | 77.8 | 0.083  | 7411  | 76.2 | 1369 | 63.2 | <0.001 |
|                    | Yes    | 5623  | 21.0 | 926  | 22.2 |        | 2315  | 23.8 | 797  | 36.8 |        |
| MI                 | No     | 21094 | 78.9 | 2817 | 67.6 | <0.001 | 8039  | 82.7 | 1766 | 81.5 | 0.226  |
|                    | Yes    | 5646  | 21.1 | 1350 | 32.4 |        | 1687  | 17.4 | 400  | 18.5 |        |
| Gender             | Female | 1355  | 2.7  | 250  | 3.2  | 0.009  | 530   | 3.1  | 196  | 5.1  | <0.001 |
|                    | Male   | 49667 | 97.3 | 7623 | 96.8 |        | 16559 | 96.9 | 3667 | 94.9 |        |

AA: African American; CHF: congestive heart failure; CVA: Cerebrovascular attack; MI: myocardial infarction; PTSD: Post-traumatic stress disorder; sd: standard deviation

Table 3: Adjusted model for readmission in patients after stroke

| Variable | Overall         |                | White           |                 | African American |                 |
|----------|-----------------|----------------|-----------------|-----------------|------------------|-----------------|
|          | HR (95% CI)     | P              | HR (95% CI)     | P               | HR (95% CI)      | P               |
|          |                 | <b>&lt;0.0</b> |                 |                 |                  |                 |
| Age      | 1.01(1.00-1.01) | <b>1</b>       | 1.01(1.00-1.01) | <b>&lt;0.01</b> | 1.01(1.00-1.01)  | <b>&lt;0.01</b> |

|                  |                 |                |                 |                 |                 |                 |
|------------------|-----------------|----------------|-----------------|-----------------|-----------------|-----------------|
| Gender: Male     | 1.02(0.93-1.13) | 0.63           | 1.05(0.93-1.19) | 0.45            | 0.98(0.84-1.16) | 0.86            |
|                  |                 | <b>&lt;0.0</b> |                 |                 |                 |                 |
| CHF              | 1.11(1.05-1.18) | <b>1</b>       | 1.11(1.04-1.19) | <b>&lt;0.01</b> | 1.10(0.99-1.22) | <b>0.07</b>     |
| Diabetes         | 1.06(1.01-1.11) | <b>0.01</b>    | 1.03(0.98-1.09) | 0.24            | 1.13(1.04-1.23) | <b>&lt;0.01</b> |
|                  |                 | <b>&lt;0.0</b> |                 |                 |                 |                 |
| Drug abuse       | 1.12(1.05-1.20) | <b>1</b>       | 1.03(0.94-1.13) | 0.48            | 1.22(1.10-1.35) | <b>&lt;0.01</b> |
| Alcohol abuse    | 1.01(0.96-1.06) | 0.62           | 1.00(0.94-1.06) | 0.94            | 1.04(0.95-1.14) | 0.40            |
|                  |                 | <b>&lt;0.0</b> |                 |                 |                 |                 |
| Hyperlipidemia   | 0.93(0.89-0.98) | <b>1</b>       | 0.92(0.86-0.97) | <b>&lt;0.01</b> | 0.96(0.88-1.05) | 0.36            |
|                  |                 | <b>&lt;0.0</b> |                 |                 |                 |                 |
| HTN              | 0.87(0.83-0.91) | <b>1</b>       | 0.89(0.84-0.95) | <b>&lt;0.01</b> | 0.81(0.74-0.89) | <b>&lt;0.01</b> |
|                  |                 | <b>&lt;0.0</b> |                 |                 |                 |                 |
| MI               | 1.17(1.10-1.25) | <b>1</b>       | 1.18(1.10-1.28) | <b>&lt;0.01</b> | 1.15(1.01-1.30) | <b>&lt;0.05</b> |
| Pre-HTN          | 0.97(0.83-1.14) | 0.71           | 1.02(0.85-1.23) | 0.80            | 0.84(0.62-1.14) | 0.26            |
|                  |                 | <b>&lt;0.0</b> |                 |                 |                 |                 |
| PVD              | 1.16(1.11-1.23) | <b>1</b>       | 1.19(1.11-1.26) | <b>&lt;0.01</b> | 1.12(1.02-1.24) | <b>&lt;0.05</b> |
| Smoking          | 0.97(0.91-1.04) | 0.4            | 0.98(0.90-1.07) | 0.66            | 0.96(0.86-1.08) | 0.53            |
| Valvular Disease | 0.97(0.89-1.05) | 0.45           | 0.96(0.87-1.06) | 0.40            | 0.99(0.84-1.17) | 0.92            |
|                  |                 | <b>&lt;0.0</b> |                 |                 |                 |                 |
| Race: AA         | 1.17(1.12-1.21) | <b>1</b>       |                 |                 |                 |                 |
| PTSD             | 1.03(0.98-1.09) | 0.23           | 1.05(0.99-1.11) | <b>0.09</b>     | 1.10(1.02-1.19) | <b>0.01</b>     |
|                  |                 | <b>&lt;0.0</b> |                 |                 |                 |                 |
| AA*PTSD          | 1.09(1.00-1.20) | <b>5</b>       |                 |                 |                 |                 |

HR: Hazard Ratio; AA: African American; PTSD: Post-traumatic stress disorder; CHF: congestive heart failure; HTN: hypertension; PVD: peripheral vascular disease



Figure 1

## Stroke Readmission by Race and PTSD

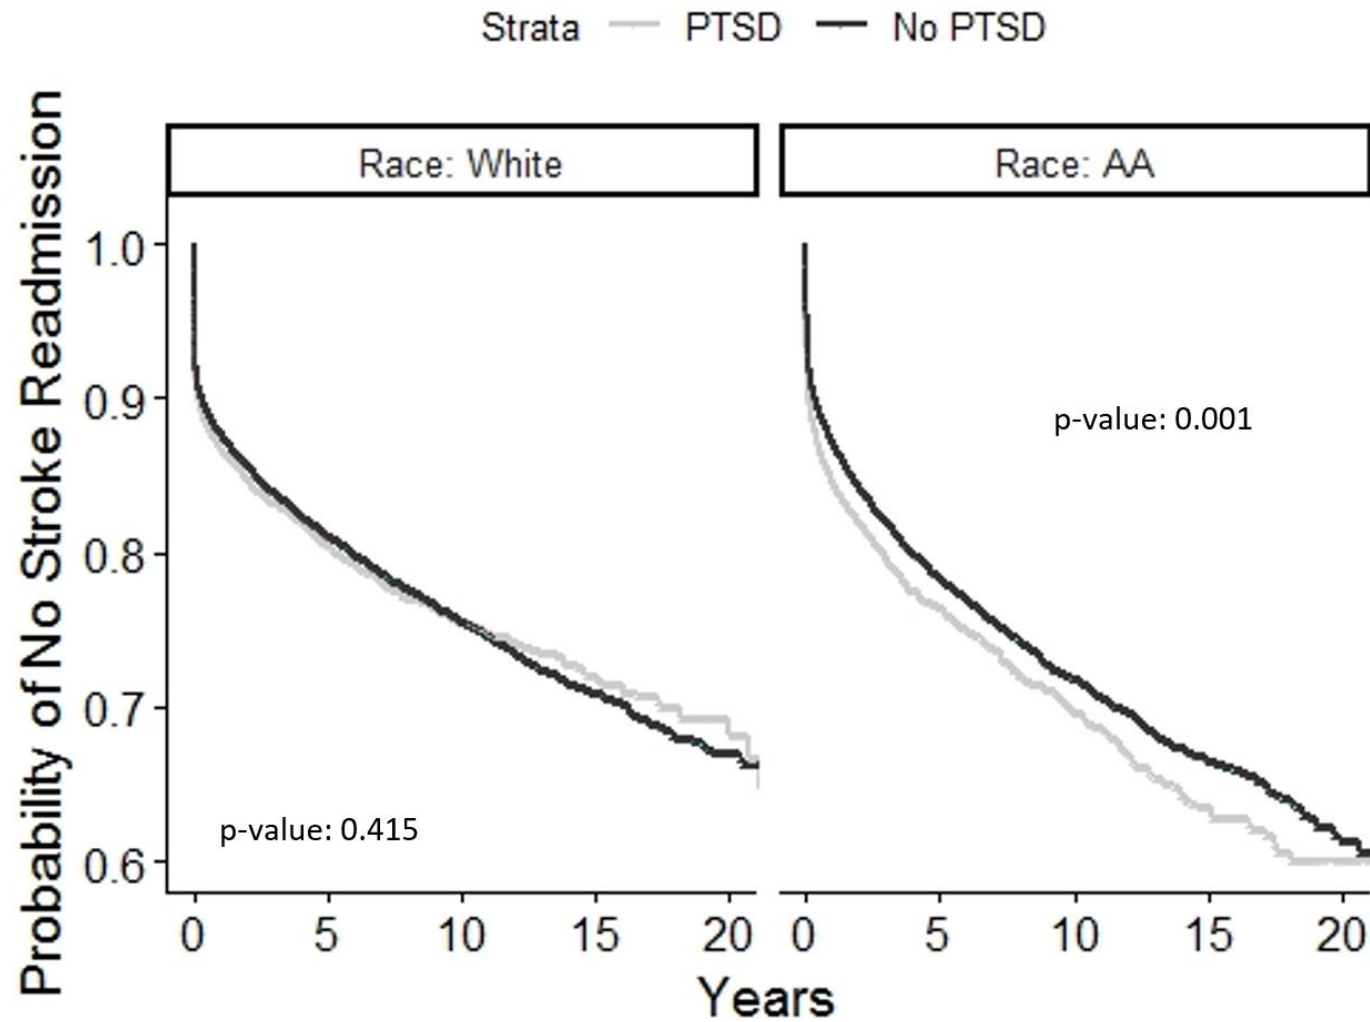

PTSD: Post-traumatic stress disorder; AA: African-American
